**Identification of Serum Bridging Molecules that Mediate Human Endothelial Cell Invasion  
by *Candida* species**

Quynh T. Phan<sup>1</sup>, Norma V. Solis<sup>1</sup>, Jianfeng Lin<sup>1</sup>, Marc Swidergall<sup>1,2</sup>, Shakti Singh<sup>1</sup>, Hong Liu<sup>1</sup>,  
Donald C. Sheppard<sup>3</sup>, Ashraf S. Ibrahim<sup>1,2</sup>, Aaron P. Mitchell<sup>4</sup>, Scott G. Filler<sup>1,2\*</sup>

<sup>1</sup>Institute for Infection and Immunity, Division of Infectious Diseases. The Lundquist Institute for Biomedical Innovation at Harbor-UCLA Medical Center, Torrance, CA 90502, USA

<sup>2</sup>David Geffen School of Medicine at UCLA, Los Angeles, CA 90024, USA

<sup>3</sup>Department of Microbiology and Immunology, Faculty of Medicine, McGill University, Montreal, Quebec, Canada

<sup>4</sup>Department of Microbiology, University of Georgia, Athens, Georgia 30602, USA

## Abstract

During hematogenously disseminated candidiasis, blood borne fungi must invade the endothelial cells that line the blood vessels to infect the deep tissues. Although *Candida albicans*, which forms hyphae, readily invades endothelial cells, other medically important species of *Candida* are poorly invasive in standard in vitro assays. Here, we show that *Candida glabrata*, *Candida tropicalis*, *Candida parapsilosis*, and *Candida krusei* can bind to vitronectin and high molecular weight kininogen present in human serum. Acting as bridging molecules, vitronectin and kininogen bind to  $\alpha_v$  integrins and the globular C1q receptor (gC1qR), inducing human endothelial cells to endocytose the fungus. This mechanism of endothelial cell invasion is poorly supported by mouse endothelial cells, but can be restored when mouse endothelial cells are engineered to express human gC1qR or  $\alpha_v$  integrin. Overall, these data indicate that bridging molecule-mediated endocytosis is a common pathogenic strategy used by many medically important *Candida spp.* to invade human vascular endothelial cells.

## Significance

The invasion of vascular endothelial cells is a key step in the pathogenesis of hematogenously disseminated candidiasis. How species of *Candida* other than *C. albicans* invade endothelial cells is poorly understood because these fungi are weakly invasive in serum-free media. Here, we demonstrate that *C. glabrata* and other *Candida* spp. bind to the serum proteins kininogen and vitronectin, which act as bridging molecules and mediate the adherence and endocytosis of the organisms by endothelial cells. These serum proteins induce endocytosis when they interact with the globular C1q receptor and  $\alpha_v$  integrins on human, but not mouse endothelial cells. Thus, bridging molecule-mediated endocytosis is a common mechanism by which medically important *Candida* spp. invade human endothelial cells.

1           Despite the widespread use of antifungal agents, disseminated candidiasis continues to  
2 be a serious problem in hospitalized patients. Previously, *Candida albicans* was the most  
3 common cause of candidemia (1). However, the epidemiology of this disease has changed, and  
4 *C. albicans* now causes less than half of these infections. In fact, the combined incidence of  
5 infections caused by *Candida glabrata*, *Candida parapsilosis*, and *Candida tropicalis* now  
6 exceeds the incidence of infections caused by *C. albicans* (2, 3). Even though the causative  
7 agents of candidemia have changed, this infection remains highly lethal. Approximately 40% of  
8 patients with candidemia die, even with currently available therapy (2, 3). A deeper  
9 understanding of the pathogenesis of this disease is essential for developing new strategies to  
10 prevent and treat invasive infections caused by multiple species of *Candida*.

11           During hematogenously disseminated candidiasis, blood-borne organisms must invade  
12 the endothelial cell lining of the vasculature to reach the target organs (4). A number of hyphal-  
13 associated factors have been found to participate in the pathogenic interactions of *C. albicans*  
14 with endothelial cells. *C. albicans* hyphae express invasins such as Als3 and Ssa1 that interact  
15 with specific host cell receptors and stimulate fungal endocytosis by endothelial cells in vitro (5-  
16 9). Organisms that do not form true hyphae on endothelial cells, such as *C. albicans* mutants  
17 with defects in hyphal formation, and *C. glabrata* and *C. tropicalis*, have greatly impaired  
18 capacity to invade these cells in standard assays (10, 11) and have highly attenuated virulence  
19 in immunocompetent mice (12-14). In patients, organisms that grow only as yeast in vivo are  
20 still able to cross the endothelial cell lining of the vasculature and infect target organs during  
21 disseminated infections (2, 3). Indeed, patients with candidemia caused by *C. glabrata*, which  
22 grows only in the yeast form in vivo, have at least as high mortality as those with candidemia  
23 due to *C. albicans* (2, 15). Thus, in humans, a filamentous *C. glabrata* is as virulent as hypha-  
24 forming *C. albicans*.

25           These data suggest that yeast-phase *Candida* spp. must be able to penetrate  
26 endothelial cells in vivo by a mechanism that is not evident in standard in vitro invasion assays.

27 Most assays of *Candida* invasion are performed using media that contain either heat-inactivated  
28 serum or no serum at all. Here we demonstrate that when yeast-phase *Candida* spp. are  
29 incubated with either fresh human serum or plasma, two proteins, high molecular weight  
30 kininogen and vitronectin bind to the fungal surface. Acting as bridging molecules, these serum  
31 proteins interact with the globular C1q receptor (gC1qR; also known as p33/HABP) and  $\alpha$   
32 integrins on the surface of human endothelial cells and induce the adherence and endocytosis  
33 of the organism. When *C. glabrata* is coated with either human or mouse serum, there is  
34 minimal endocytosis by mouse endothelial cells, suggesting a key limitation of the mouse model  
35 to study vascular invasion by yeast phase *Candida* spp. This defect in endocytosis can be  
36 rescued in vitro by expressing either human gC1qR or human  $\alpha$  integrin in mouse endothelial  
37 cells. Thus, we delineate a previously unexplored mechanism by which fungi can invade human  
38 endothelial cells.

39

## 40 **Results**

41 **Serum and plasma enhance the endocytosis of *Candida* spp.** Previously, we found that  
42 yeast-phase *C. albicans*, such as live *efg1 $\Delta$ / $\Delta$  cph1 $\Delta$ / $\Delta$*  mutant cells or killed wild-type yeast,  
43 are very poorly endocytosed by human endothelial cells in vitro (11). Although it has been  
44 determined that yeast-phase *C. parapsilosis* cells are endocytosed by endothelial cells in vitro,  
45 this process is much slower and less efficient than the endocytosis of hyphal-phase *C. albicans*  
46 (16). A limitation of these previous experiments is that they were performed in serum-free  
47 media. It is known that serum proteins can act as bridging molecules and mediate the  
48 adherence of bacteria to endothelial cells (17, 18). Therefore, we investigated whether serum  
49 components could act as bridging molecules between *Candida* spp. and endothelial cells. Live  
50 *C. glabrata* yeast and methanol killed, yeast phase *C. albicans* cells were incubated in 20%  
51 pooled human serum that was either fresh or heat-inactivated. Killed *C. albicans* cells were  
52 used in these experiments because live organisms germinate when exposed to serum (19). The

53 fungal cells were then rinsed and incubated with human umbilical vein endothelial cells. When  
54 the organisms were incubated with heat-inactivated serum, few cells were endocytosed,  
55 similarly to control organisms that had been incubated in serum-free medium (Fig. 1A and B).  
56 When the organisms were incubated in fresh serum, the number of endocytosed cells increased  
57 by 8- to 9-fold. Incubating *C. glabrata* and *C. albicans* with fresh serum also increased the  
58 number of cell-associated organisms, a measure of adherence (Fig. 1C and D). To verify that  
59 serum could enhance the endothelial cell interactions of live *C. albicans*, we tested an *efg1Δ/Δ*  
60 *cph1Δ/Δ* mutant strain that remains in the yeast phase when exposed to serum (14). The  
61 endocytosis and adherence of this strain were increased when it was incubated in fresh serum  
62 as compared to heat-inactivated serum (SI Appendix, Fig. S1A and B). Fresh serum also  
63 significantly enhanced the endothelial cell endocytosis and adherence of live, yeast-phase *C.*  
64 *parapsilosis*, *Candida krusei*, and *Candida auris*, but not *C. tropicalis* (Fig. 1E and F). Fresh  
65 human plasma was at least as effective as fresh human serum at enhancing the endocytosis  
66 and adherence of *C. glabrata* (SI Appendix, Fig. S1C and D), indicating that both plasma and  
67 serum contain factors that strongly enhance the endothelial cell interactions of yeast-phase  
68 organisms.

69 Although fresh serum significantly enhanced the endocytosis and adherence of multiple  
70 species of *Candida*, it only increased the adherence of *S. cerevisiae* but had no effect on  
71 endocytosis (SI Appendix, Fig. S1E and F). Thus, the bridging molecules that bind to *Candida*  
72 spp. appear to be non-functional after they bind to *S. cerevisiae*.

73 To verify that the serum-coated organisms were being endocytosed, endothelial cells  
74 were infected with serum-coated *C. glabrata*, fixed and then stained for actin. We observed that  
75 actin microfilaments coalesced around *C. glabrata* cells, a hallmark of endocytosis (Fig. 1G).  
76 When endothelial cells were treated with cytochalasin D to depolymerize actin, the endocytosis  
77 of serum-coated organisms was significantly decreased (Fig. 1H). Cytochalasin D also reduced  
78 the number of adherent organisms (Fig. 1I). Collectively, these data suggest the model that

79 heat-labile serum proteins function as bridging molecules that induce endothelial cells to  
80 endocytose yeast-phase *Candida* spp.

81  
82 **The globular C1q receptor (gC1qR) and  $\alpha$ v integrins are endothelial cell receptors for**  
83 **serum-coated yeast-phase *C. glabrata*.** To identify potential endothelial cell receptors for  
84 serum-coated organisms, we employed an affinity-purification approach (6-8) using intact *C.*  
85 *glabrata* cells that had been coated with either fresh or heat-inactivated serum. Among the  
86 endothelial cell membrane proteins that were found to bind to serum-coated *C. glabrata* (SI  
87 Appendix, Table S1), gC1qR was selected for in-depth analysis because it is known to bind to  
88 several different serum proteins (20). Of note, we did not detect binding of serum-coated *C.*  
89 *glabrata* to N-cadherin, which we have found previously to be an endothelial cell receptor for *C.*  
90 *albicans* Als3 and Ssa1, invasins that are expressed by hyphae (5, 6, 8). Thus, serum-coated *C.*  
91 *glabrata* cells interact with different endothelial cell receptors than do *C. albicans* hyphae.

92 By immunoblotting with an anti-gC1qR monoclonal antibody, we verified that gC1qR was  
93 indeed bound by serum-coated *C. glabrata* cells (Fig. 2A). To determine the functional  
94 significance of this binding, we used siRNA to knockdown gC1qR. We found the gC1qR siRNA  
95 significantly inhibited the endocytosis of serum-coated *C. glabrata* (Fig. 2B and SI Appendix,  
96 Fig. S2). The gC1qR siRNA also slightly inhibited *C. glabrata* adherence (Fig. 2C). Because  
97 gC1qR is known to be expressed both intracellularly and on the cell surface (21, 22), siRNA  
98 knockdown likely depleted both pools of this protein. To verify that surface-expressed gC1qR  
99 was required for the endocytosis of serum-coated *C. glabrata*, we tested two different anti-  
100 gC1qR monoclonal antibodies for their capacity to inhibit endothelial cell interactions of serum-  
101 coated *C. glabrata*. Antibody 74.5.2, which recognizes the high molecular weight kininogen  
102 binding site in the C-terminus of the gC1qR (23, 24), reduced endocytosis by 45% but did not  
103 significantly affect adherence (Fig. 2D and E). By contrast, antibody 60.11, which is directed  
104 against the C1q binding site in the N-terminus of the gC1qR, had no effect on either endocytosis

105 or adherence. Collectively, these data suggest that the gC1qR functions as an endothelial cell  
106 receptor for serum-coated *C. glabrata*.

107         The finding that blocking gC1qR resulted in incomplete inhibition of endocytosis  
108 prompted us to search for additional endothelial cell receptors for serum-coated *C. glabrata*.  
109 Because integrins bind to serum proteins that could potentially act as bridging molecules, we  
110 screened a panel of anti-integrin monoclonal antibodies for their capacity to block the endo-  
111 cytosis of serum-coated *C. glabrata*. We found that antibodies against integrins  $\alpha\beta3$  and  $\alpha\beta5$   
112 inhibited endocytosis and adherence by approximately 45% (Fig. 3A-D). Although some  
113 antibodies against integrins  $\alpha\beta3$  and  $\alpha\beta5$  also bind to the surface of *C. albicans* (25, 26), flow  
114 cytometry confirmed that the monoclonal antibodies used in our experiments did not bind to *C.*  
115 *glabrata* (SI Appendix, Fig. S3). Endocytosis and adherence of *C. glabrata* was similarly  
116 inhibited by siRNA knockdown of integrin  $\alpha\upsilon$ , but not by knockdown of the unrelated integrin  $\alpha5$   
117 (Fig. 3E and F, SI Appendix, Fig. S4). Notably, blocking gC1qR and integrins  $\alpha\beta3$  and  $\alpha\beta5$   
118 simultaneously resulted in near maximal reduction in endocytosis, but did not further decrease  
119 adherence (Fig. 3G and H), indicating that gC1qR and integrins  $\alpha\beta3$  and  $\alpha\beta5$  make additive  
120 contributions to endocytosis.

121         To further explore the relationship among the gC1qR and the integrins  $\alpha\beta3$  and  $\alpha\beta5$ ,  
122 we infected endothelial cells with serum-coated *C. glabrata*, stained them with antibodies  
123 against the three receptors, and then imaged them with confocal microscopy. We observed that  
124 all three receptors accumulated around endocytosed organisms (Fig. 3I). Collectively, these  
125 results support the model that when serum proteins bind to a *C. glabrata* cell, they interact with  
126 gC1qR and integrins  $\alpha\beta3$  and  $\alpha\beta5$ , which causes the fungus to adhere to endothelial cells and  
127 induce its own endocytosis.

128

129 **High molecular weight kininogen and vitronectin are bridging molecules that mediate the**  
130 **endocytosis of serum-coated organisms.** Next, we sought to identify potential bridging



131 molecules that mediate the binding of serum-coated organisms to gC1qR and integrins  $\alpha\beta3$   
132 and  $\alpha\beta5$ . After incubating *C. glabrata* cells in fresh serum, we rinsed them extensively and  
133 eluted the bound serum proteins with HCl followed by Tris neutralization. The eluted proteins  
134 were separated by SDS-PAGE and analyzed by Western blotting to detect proteins that are  
135 known to bind to these receptors. Two proteins, high molecular weight kininogen and  
136 vitronectin, were identified. These proteins could be eluted from *C. glabrata* when the cells were  
137 incubated in fresh serum, but not heat-inactivated serum (Fig. 4A). To determine whether the  
138 binding of these proteins to *C. glabrata* was functionally significant, we analyzed the effects of  
139 antibodies against kininogen and vitronectin on the endocytosis of serum-coated *C. glabrata*.  
140 We found that antibodies against each protein significantly inhibited endocytosis, but had no  
141 effect on adherence (Fig. 4B, SI Appendix, Fig. S5A), suggesting that these proteins may  
142 function as bridging molecules that induce endothelial cells to endocytose *C. glabrata*.

143 High molecular weight kininogen is cleaved by kallikrein and other proteases, releasing  
144 bradykinin from the larger protein. The remaining protein, called HKa, consists of a 62 kDa  
145 heavy chain that is linked by a disulfide bond to a 56 kDa light chain (27). By immunoblotting  
146 with specific monoclonal antibodies and looking for bands of the appropriate molecular mass,  
147 we found that both the heavy and light chains of HKa bound to *C. glabrata* (Fig. 4A and C). Both  
148 of these chains were bound by *C. glabrata* when the cells were incubated in fresh human  
149 serum, but not with heat-inactivated serum. Collectively, these results suggest that high  
150 molecular weight kininogen is cleaved to HKa, which then binds to *C. glabrata*.

151 Using flow cytometry, we analyzed the relationship between the binding of kininogen and  
152 vitronectin to *C. glabrata*. We found that when the organisms were incubated with kininogen  
153 alone, very little protein bound to them (Fig. 4D and E). When the organisms were incubated  
154 with kininogen in the presence of vitronectin, kininogen binding increased significantly. By  
155 contrast, vitronectin bound to the organisms both in the presence and absence of kininogen

156 (Fig. 4D and F). These results suggest the model that vitronectin binds to the organism and  
157 facilitates the binding of kininogen.

158 To determine if kininogen and vitronectin could function as bridging molecules in the  
159 absence of other serum proteins, we incubated *C. glabrata* cells with these proteins, either  
160 alone or in combination, and then measured their endocytosis by endothelial cells. When the  
161 organisms were incubated with kininogen alone, few organisms were endocytosed, similarly to  
162 control organisms that had been incubated in BSA (Fig. 4G). When the organisms were  
163 incubated in vitronectin alone, endocytosis increased significantly, and it increased even more  
164 when the organisms were incubated in both kininogen and vitronectin. The combination of  
165 kininogen and vitronectin also significantly increased the adherence of the organisms, while  
166 kininogen and vitronectin alone had no effect (SI Appendix, Fig. S5B). Collectively, these data  
167 indicate that the human serum proteins kininogen and vitronectin function as bridging molecules  
168 that enhance the adherence and induce endocytosis of *C. glabrata* by human endothelial cells.

169 Next, we investigated the endothelial cell interactions of *C. albicans* cells that had been  
170 incubated in kininogen and vitronectin prior to being added to these host cells. These  
171 experiments were feasible because, unlike serum, kininogen and vitronectin did not induce  
172 significant filamentation. We found that preincubating organisms with these proteins significantly  
173 enhanced the endocytosis and adherence of the *C. albicans efg1Δ/Δ cph1Δ/Δ* mutant, which  
174 remained in the yeast phase while in contact with the endothelial cells (Fig. 5A and SI Appendix,  
175 Fig. S6A). Also, kininogen and vitronectin slightly enhanced the endocytosis of wild-type *C.*  
176 *albicans*, which formed hyphae on the endothelial cells, and largely rescued the endocytosis  
177 and adherence defects of the invasin-deficient *als3Δ/Δ ssa1Δ/Δ* mutant (Fig. 5B and SI  
178 Appendix, Fig. S6B).

179 When wild-type *C. albicans* is endocytosed by endothelial cells, it damages these cells,  
180 likely by releasing candidalysin into the invasion pocket (6, 29-31). We tested whether coating  
181 the *als3Δ/Δ ssa1Δ/Δ* mutant with kininogen and vitronectin would restore its capacity to damage

182 endothelial cells. While organisms coated with BSA caused minimal endothelial cell damage,  
183 cells coated with kininogen and vitronectin induced significantly greater damage (Fig. 5C).  
184 These results indicate that in the absence of invasins, bridging molecules can enhance the  
185 endocytosis of *C. albicans* hyphae, leading to subsequent endothelial cell damage.

186 As we had observed that fresh serum increased the endocytosis of species of *Candida*,  
187 other than *C. albicans*, we investigated whether human kininogen and vitronectin functioned as  
188 bridging molecules for these organisms. We found that these proteins significantly increased the  
189 endocytosis of *C. parapsilosis*, *C. tropicalis*, and *C. krusei*, but not *C. auris*. (Fig. 5D). Kininogen  
190 and vitronectin also increased the endothelial cell adherence of *C. parapsilosis* and *C. krusei* (SI  
191 Appendix, Fig. S6C). Next, we tested whether the enhanced endocytosis of these organisms by  
192 kininogen and vitronectin would result in endothelial cell damage. To increase the sensitivity of  
193 the experiment, we increased the inoculum and extended the incubation period to 6 hr. None of  
194 these organisms caused detectable damage to the endothelial cells (SI Appendix, Fig. S6D),  
195 indicating that induction of endocytosis alone is not sufficient for these species of *Candida* to  
196 cause significant endothelial cell damage.

197 To investigate which endothelial cell receptor was responsible for interacting with each  
198 bridging molecule, we tested the inhibitory effects of specific antibodies directed against gC1qR  
199 and  $\alpha$ v integrins. When *C. glabrata* cells were incubated with vitronectin alone, endocytosis was  
200 significantly inhibited by antibodies against integrins  $\alpha$ v $\beta$ 3 and  $\alpha$ v $\beta$ 5, but not by the anti-gC1qR  
201 antibody (Fig. 5E). None of these antibodies significantly reduced the adherence of vitronectin-  
202 coated organisms (SI Appendix, Fig. S6E). When the organisms were incubated with vitronectin  
203 and kininogen, endocytosis was inhibited by both the anti-gC1qR antibody and the anti- $\alpha$ v  
204 integrin antibodies (Fig. 5F). The combination of all 3 antibodies inhibited endocytosis in an  
205 additive manner and also inhibited adherence (SI Appendix, Fig. S6F). Taken together, these  
206 data support the model that vitronectin likely binds first to the fungal surface where it is  
207 recognized mainly by integrins  $\alpha$ v $\beta$ 3 and  $\alpha$ v $\beta$ 5 (Fig. 6). Binding of vitronectin enables kininogen

208 to bind to fungal cell surface, and the vitronectin-kininogen complex is recognized by both  
209 gC1qR and the  $\alpha$ v integrins, leading to the strong adherence and subsequent endocytosis of the  
210 organism.

211

212 **Expression of human gC1qR and  $\alpha$ v integrins on mouse endothelial cells enhances**  
213 **bridging molecule mediated endocytosis.** Next, we investigated whether mouse serum  
214 bridging molecules also mediated the endocytosis of *C. glabrata* by comparing the capacity of  
215 mouse and human serum to mediate endocytosis by human endothelial cells. To maximize  
216 endocytosis, we incubated the organisms in 100% serum. We observed that after 45 min,  
217 mouse serum enhanced the endocytosis of *C. glabrata* by human endothelial cells, but to a  
218 lesser extent than human serum (Fig. 7A). Mouse serum also increased adherence to human  
219 endothelial cells, but not as much as human serum (SI Appendix, Fig. S7A). These differences  
220 in endocytosis and adherence persisted even when the incubation period was increased to 3 h  
221 (Fig. 7B and SI Appendix, Fig. S7B). These results indicate that while mouse serum proteins  
222 can function as bridging molecules between *C. glabrata* and human endothelial cells, they are  
223 less effective than human serum proteins.

224 To investigate whether serum bridging molecules could mediate the endocytosis of *C.*  
225 *glabrata* by mouse endothelial cells, we obtained primary mouse kidney and liver endothelial  
226 cells and tested their capacity to endocytose *C. glabrata* cells that had been coated with either  
227 human or mouse serum. We found that there was minimal endocytosis and adherence of  
228 organisms coated with human or mouse serum by mouse endothelial cells after both 45 min and  
229 180 min (Fig. 7A and B, SI Appendix, Fig. S7A and B). To verify that human endothelial cells  
230 other than those obtained from umbilical cord veins were able to endocytose serum coated  
231 organisms, we tested a Tert-immortalized human microvascular endothelial (TIME) cell line. *C.*  
232 *glabrata* cells coated with human serum were endocytosed by and adhered to the TIME cells  
233 more than human umbilical vein endothelial cells (SI Appendix, Fig. S7C and D). Collectively,

234 these data indicate that while both mouse and human serum proteins can function as bridging  
235 molecules between *C. glabrata* and human endothelial cells, mouse endothelial cells have very  
236 limited capacity to endocytose organisms coated with serum from either mice or humans.

237 We considered the possibility that the inability of mouse endothelial cells to endocytose  
238 serum coated *C. glabrata* was due to difference between the receptors on mouse vs. human  
239 endothelial cells. To evaluate the possibility, we used lentivirus to transduce primary mouse liver  
240 endothelial cells with human *C1QBP* (gC1qR), *ITGAV* (integrin  $\alpha$ v), or *ITGB5* (integrin  $\beta$ 5).  
241 Control cells were transduced with lentivirus encoding GFP. The expression of the human  
242 proteins by the transduced endothelial cells was verified by Western blotting (SI Appendix, Fig.  
243 7E). Endothelial cells that expressed human gC1qR and integrin  $\alpha$ v endocytosed significantly  
244 more serum-coated organisms than did the control endothelial cells (Fig. 7C). *C. albicans* also  
245 had enhanced adherence to the cells that expressed human gC1qR, integrin  $\alpha$ v, and integrin  $\beta$ 5  
246 (SI Appendix, Fig. S7F). These data demonstrate that human gC1qR and integrin  $\alpha$ v mediate  
247 the endocytosis and adherence of serum-coated *C. glabrata*. They also suggest that these  
248 human receptors are functionally different from their mouse counterparts.

249

## 250 **Discussion**

251 In this study, we sought to elucidate how species of *Candida* that do not form true hyphae are  
252 able to invade vascular endothelial cells. Using *C. glabrata* as a representative fungus that  
253 grows only as yeast within the human host, we determined that proteins present in human  
254 serum act as bridging molecules between the fungus and human endothelial cells and induce  
255 the adherence and subsequent endocytosis of the organism. The data presented here indicate  
256 that binding of vitronectin to the fungal surface facilitates the subsequent binding of kininogen.  
257 Vitronectin interacts mainly with the integrins  $\alpha$ v $\beta$ 3 and  $\alpha$ v $\beta$ 5 endothelial cells, and the  
258 kininogen-vitronectin complex also interacts with gC1qR. The binding of these serum proteins to

259 their respective receptors causes the organism to adhere to endothelial cells and stimulates its  
260 subsequent endocytosis (Fig. 6). Not only did kininogen and vitronectin act as bridging  
261 molecules for *C. glabrata*, but they also mediated endothelial cell endocytosis of yeast-locked  
262 and invasin-deficient *C. albicans* mutants and other medically important species of *Candida*,  
263 including *C. tropicalis*, *C. parapsilosis*, and *C. krusei*. Although serum enhanced the endocytosis  
264 of *C. auris*, kininogen and vitronectin did not, suggesting that other serum proteins must function  
265 as bridging molecules for this organism. Also, serum bridging molecules did not induce the  
266 endocytosis of *S. cerevisiae*, indicating that bridging molecule-mediated endocytosis is not a  
267 general property of yeast. Taken together, these results indicate that invasion of vascular  
268 endothelial cells via bridging molecule-mediated endocytosis is a pathogenic strategy shared by  
269 many medically important *Candida* spp.

270 Vitronectin, which is bound by integrins  $\alpha v\beta 3$  and  $\alpha v\beta 5$ , is known to function as a  
271 bridging molecule that mediates adherence to respiratory epithelial cells of a variety of bacteria,  
272 including nontypeable *Haemophilus influenzae*, *Moraxella catarrhalis*, group A streptococci, and  
273 *Pseudomonas aeruginosa* (reviewed in (32)). In addition to mediating adherence, vitronectin  
274 induces the internalization of *Neisseria gonorrhoeae* and *Pseudomonas fluorescens* by  
275 epithelial cells (33, 34). *C. albicans*, *C. parapsilosis* and *C. tropicalis* have been shown to bind to  
276 fluid phase vitronectin (35), and the binding of *C. albicans* to vitronectin mediates adherence to  
277 keratinocytes (36). Our findings demonstrate that *C. glabrata* and *C. krusei* are additional  
278 *Candida* spp. that bind to vitronectin. More importantly, we show that vitronectin acts as a  
279 bridging molecule that, in conjunction with kininogen, mediates the endocytosis of these  
280 organisms by human endothelial cells.

281 Studies of the interaction of kininogen with microbial pathogens have focused mainly on  
282 its proteolytic cleavage to release bradykinin and other fragments with antimicrobial activity.  
283 Kininogen has been found to bind to *S. aureus*, *Salmonella typhimurium*, and *Bacteroides* spp.  
284 (37, 38). Rapala-Kozik et al., have determined that virtually all medically important *Candida* spp.

285 bind kininogen (39-41). In contrast to the results shown here, they found that kininogen could  
286 bind to the fungus in the absence of additional serum proteins, whereas we found that there was  
287 minimal binding of kininogen to *C. glabrata* unless vitronectin was present. The likely  
288 explanation for these divergent results is that the other investigators used a more sensitive  
289 assay that was able to detect the binding of even low amounts of kininogen to the fungal  
290 surface. Nevertheless, our results indicate that vitronectin dramatically increases the amount of  
291 kininogen that binds to *C. glabrata* and enables kininogen to function as a bridging molecule  
292 that enhances fungal endocytosis.

293         Although the function of kininogen as a bridging molecule between microbial pathogens  
294 and host cells has not been appreciated previously, it is known that kininogen can bind to  
295 glycoprotein 1b on platelets and integrin  $\alpha M\beta 2$  on neutrophils to enhance the co-adherence of  
296 these two cells (42). We determined that unlike platelets and neutrophils, endothelial cells bind  
297 kininogen via gC1qR, a result that has been reported by others (43). gC1qR has also been  
298 found to be a receptor for *Listeria monocytogenes* that mediates the internalization of this  
299 organism. However, this bacterium binds directly to gC1qR, and the interaction can be blocked  
300 by both C1q and monoclonal antibody 60.11, which is directed against the C1q binding site of  
301 gC1qR (44). By contrast, we found that while monoclonal antibody 60.11 did not inhibit bridging  
302 molecule-mediated endocytosis of *C. glabrata*, monoclonal antibody 74.5.2, which is directed  
303 against the kininogen binding site of gC1qR, was highly inhibitory. These results support the  
304 model that when kininogen is bound to the surface of *Candida* spp., it interacts with gC1qR on  
305 endothelial cells and stimulates the endocytosis of the organisms.

306         Patients with hematogenously disseminated candidiasis due to *C. glabrata*, *C. tropicalis*,  
307 *C. krusei*, and *C. auris* have at least as high mortality as those who are infected with *C.*  
308 *albicans*(2, 15, 45). These data suggest that in humans, these different species of *Candida* have  
309 similar virulence. In immunocompetent mice, *C. albicans* is highly virulent, and most wild-type  
310 strains are capable of causing a lethal infection. By contrast, intravenous infection of



311 immunocompetent mice with *C. glabrata*, *C. tropicalis*, *C. krusei*, and *C. auris* induces minimal  
312 mortality even when high inocula are used (46, 47). Thus in mice, these species of *Candida*  
313 have greatly attenuated virulence. A possible explanation for this discrepancy is that *C.*  
314 *albicans* is able to form hyphae that express invasins such as Als3 and Ssa1 that interact  
315 directly with endothelial cell receptors and induce endothelial cell endocytosis. By contrast,  
316 other species of *Candida*, such as *C. glabrata* invade endothelial cells by bridging molecule-  
317 mediated endocytosis, a process that occurs inefficiently in mice.

318         The results of the in vitro studies supported this concept. *C. albicans* was endocytosed  
319 avidly by human endothelial cells in the absence of serum and coating the organism with serum  
320 only increased endocytosis slightly. *C. glabrata* was avidly endocytosed by human endothelial  
321 cells only when it was coated with serum proteins. Both mouse and human proteins increased  
322 endocytosis by human cells, indicating that mouse serum proteins can function as bridging  
323 molecules, albeit not as well as human proteins. Importantly, *C. glabrata* was poorly  
324 endocytosed by mouse liver and kidney endothelial cells when it was coated with either mouse  
325 or human serum. When the mouse endothelial cells were engineered to express human gC1qR  
326 or integrin  $\alpha_v$ , they gained the capacity to endocytose serum-coated *C. glabrata*. These data  
327 indicate that a key difference between mice and humans is that mouse gC1qR and integrin  $\alpha_v$   
328 do not support bridging molecule-mediated endocytosis of *C. glabrata*.

329         Although the mouse model of disseminated candidiasis is an excellent model for  
330 investigating antifungal efficacy and many aspects of fungal pathogenicity, our results suggest  
331 that this model is not optimal for investigating how *C. glabrata* and possibly other *Candida* spp.  
332 other than *C. albicans* disseminate hematogenously because mouse endothelial cells do not  
333 support bridging molecule-mediated vascular invasion. Even though mice inoculated  
334 intravenously with these organisms still contain some fungal cells in their tissues, we speculate  
335 that the organisms must egress from the vasculature by another mechanism(s) that has less  
336 pathogenic impact. This possibility is currently being investigated.



337           The results presented here indicate that many medically important species of *Candida*  
338 can utilize serum proteins as bridging molecules to induce their own endocytosis by human  
339 vascular endothelial cells. Because this mechanism is shared by multiple *Candida spp.*, it  
340 represents a promising therapeutic target for preventing or ameliorating hematogenously  
341 disseminated candidiasis.

342

## 343 **Methods**

344 **Ethics statement.** All animal work was approved by the Institutional Animal Care and Use  
345 Committee (IACUC) of the Lundquist Institute for Biomedical Innovation at Harbor-UCLA  
346 Medical Center. The collection of blood from normal human volunteers was performed under  
347 protocol 30636-01R, which was approved by the IRB of the Lundquist Institute. Informed  
348 consent was obtained prior to phlebotomy.

349

350 **Serum and plasma.** After obtaining informed consent, blood was collected by venipuncture  
351 from healthy volunteers. Blood was also collected from anesthetized Balb/C mice by cardiac  
352 puncture. To obtain serum, the blood was allowed to clot at room temperature for 30 min and  
353 then centrifuged at 2000 rpm for 10 min at 4°C. After collecting the serum, samples from  
354 individual donors were pooled and stored in aliquots in liquid nitrogen. To make heat-inactivated  
355 serum, the fresh serum was incubated at 56°C for 1 hr and stored in aliquots in liquid nitrogen.

356           To obtain plasma, fresh human blood was transferred to 4 ml vacutainer tubes  
357 containing 7.2 mg of K<sub>2</sub>EDTA (BD, Inc.). The tubes were then centrifuged at 2000 rpm for 10  
358 minutes at 4°C, after which the plasma was collected, pooled, aliquoted, and stored in liquid  
359 nitrogen. Heat-inactivated plasma was made by incubating fresh plasma at 56°C for 1 hr.

360

361 **Host cells, fungal strains and growth conditions.** Human umbilical vein endothelial cells  
362 were isolated from umbilical cords and grown as described (30, 48). Mouse kidney endothelial

363 cells (Cell Biologics), mouse liver endothelial cells (Cell Biologics), and hTert-immortalized  
364 human microvascular endothelial cells (American Type Culture Collection) were purchased and  
365 grown according to the suppliers' instructions.

366 The fungal strains used in this work are listed in Supplemental Table 2. For use in the  
367 experiments, the organisms were grown overnight in yeast extract peptone dextrose (YPD)  
368 broth at 30°C in a shaking incubator. They were harvested by centrifugation, washed twice with  
369 PBS and enumerated with a hemacytometer as previously described (30). To produce killed  
370 organisms, cells of *C. albicans* strain DIC185 were pelleted by centrifugation and then  
371 resuspended in 100% methanol for 2 min. The killed organisms were recovered by  
372 centrifugation and washed two times with PBS. Fungal killing was verified by plating a sample of  
373 the cells onto YPD agar.

374 Strain DSC10 was constructed by plating strain CAN34 (*efg1Δ/Δ cph1Δ/Δ*) on minimal  
375 medium containing 5-fluororotic acid. The resulting Ura<sup>-</sup> strain was transformed with a PstI/NotI-  
376 digested fragment of pBSK-URA3 (49) to restore the *URA3-IRO1* locus. Proper integration was  
377 verified by PCR.

378  
379 **Coating fungal cells with bridging molecules.** To coat the organisms with serum or plasma,  
380 approximately  $5 \times 10^7$  fungal cells were mixed with either RPMI 1640 medium alone (Irvine  
381 Scientific) or RPMI 1640 medium containing 20% fresh or heat-inactivated human serum and  
382 then incubated for 1 hr at 37°C in a shaking incubator. In some experiments, the human serum  
383 was replaced with human plasma to which  $\text{CaCl}_2$  was added to reverse the effects of the EDTA.  
384 In experiments comparing mouse with human serum, the organisms were incubated with either  
385 100% mouse or human serum. After coating, the fungal cells were washed twice with PBS,  
386 diluted, and counted for use in the assays described below.

387 To coat the organisms with bridging molecules, approximately  $2 \times 10^7$  fungal cells were  
388 incubated with human kininogen (10 μg/ml; Molecular Innovations, Inc., Cat. # HK-TC) and/or

389 human vitronectin (30 µg/ml; Molecular Innovations Inc., Cat. # HVN-U) in RPMI 1640 medium  
390 supplemented with 50 µM ZnCl<sub>2</sub> and 3 µM CaCl<sub>2</sub>. Control cells were incubated with BSA  
391 (Sigma-Aldrich). The cells were incubated for 1 hr at 37°C in a shaking incubator and processed  
392 as described above.

393  
394 **Confocal microscopy.** The confocal microscopy was performed as previously described (6).  
395 Briefly, endothelial cells were grown to confluency on fibronectin-coated glass coverslips and  
396 then infected with 3x10<sup>5</sup> *C. glabrata* cells. After 45 min, the cells were fixed with 3%  
397 paraformaldehyde and blocked with 5% goat serum containing 0.05% Triton X-100. The cells  
398 were incubated with Alexa Fluor 568-labeled phalloidin (Thermo Fisher Scientific, Cat.  
399 #A12380), rabbit anti-gC1qR antibody (Santa Cruz Biotechnology, Cat. #sc-48795), anti-integrin  
400 αβ3 monoclonal antibody (Millipore-Sigma, clone LM609, Cat. # MAB1976), or anti-integrin  
401 αβ5 monoclonal antibody (Millipore-Sigma, clone P1f6, Cat. # MAB1961). After extensive  
402 rinsing, the cells were incubated with the appropriate Alexa Fluor labeled secondary antibody  
403 (Thermo Fisher Scientific, Cat. #A-11031 or A-11034), rinsed, and then imaged by confocal  
404 microscopy. The *C. glabrata* cells were viewed by differential interference contrast. Consecutive  
405 z-stacks were combined to create the final images.

406  
407 **Endocytosis assay.** The endocytosis of the various organisms by endothelial cells was  
408 determined by our standard differential fluorescence assay as described previously (6, 50).  
409 Briefly, endothelial cells grown on fibronectin-coated glass coverslips were incubated with 10<sup>5</sup>  
410 fungal cells in 5% CO<sub>2</sub> at 37°C for 45 or 180 min. Next, the cells were fixed in 3%  
411 paraformaldehyde, and the non-endocytosed organisms were stained with an anti-*Candida*  
412 antibody (Meridian Life Science, Cat. # B65411R) that had been conjugated with Alexa Fluor  
413 568 (Thermo Fisher Scientific, Cat. # A-10235). After rinsing the cells extensively with PBS, the  
414 endothelial cells were permeabilized in 0.05% Triton X-100 (Sigma-Aldrich), and the cell-

415 associated organisms were stained with the anti-*Candida* antibody conjugated with Alexa Fluor  
416 488 (Thermo Fisher Scientific). The coverslips were mounted inverted on microscope slides and  
417 viewed with an epifluorescent microscope. The number of endocytosed organisms was  
418 determined by scoring at least 100 organisms per slide. Each experiment was performed at  
419 least three times in triplicate.

420 The effects of depolymerizing microfilaments on endocytosis was determined by  
421 incubating the endothelial cells with 0.4  $\mu$ M cytochalasin D (Sigma-Aldrich) for 45 min prior to  
422 infection. Control endothelial cells were incubated in the diluent (0.1% DMSO) in parallel. The  
423 cytochalasin D and DMSO remained in the medium for the duration of the infection. To  
424 determine the effects of blocking endothelial cell receptors on endocytosis, the endothelial cells  
425 were incubated with anti-gC1qR antibodies (Santa Cruz Biotechnology, clone 74.5.2 Cat. #  
426 sc-23885 and Abcam, clone 60.11, Cat. # ab24733), anti- $\alpha$ v $\beta$ 3 antibody (Millipore Sigma, clone  
427 LM609, Cat. # MAB1976),  $\alpha$ v $\beta$ 5 (Millipore Sigma, clone P1F6, Cat. # MAB1961), or a  
428 combination of antibodies, each at 10  $\mu$ g/ml. Control cells were incubated in the same  
429 concentration of mouse IgG (R&D Systems, clone 11711; # MAB002). The endothelial cells  
430 were incubated with the antibodies for 1 hr prior to infection and the antibodies remained in the  
431 medium for the duration of infection.

432 To determine the effects of inhibit bridging molecules on endocytosis, *C. glabrata* cells  
433 were coated with 20% heat-inactivated or fresh serum in the presence of an anti-kininogen  
434 antibody (Santa Cruz Biotechnology, clone 2B5, Cat. # sc-23914), an anti-vitronectin antibody  
435 (Millipore Sigma, clone 8E6(LJ8), Cat. # MAB88917), or an isotype control IgG, each at  
436 10  $\mu$ g/ml. The organisms were then washed twice with PBS, counted, and used in the  
437 endocytosis assay.

438  
439 **Protein purification and Western blotting.** Endothelial cell membrane proteins were isolated  
440 using glucopyranoside according to our previously described method<sup>6-8</sup>. To pull down

441 endothelial cell proteins that bound to serum-coated *C. glabrata*,  $8 \times 10^8$  organisms that had been  
442 coated with fresh or heat-inactivated serum were incubated with 1 mg of endothelial cell  
443 membrane proteins on ice for 1 hr. Unbound proteins were removed by rinsing with 1.5%  
444 glucopyranoside, after which the bound proteins were eluted with 6M Urea. Samples were  
445 added to SDS-PAGE sample buffer, heated to 90°C for 5 min, and then separated by SDS-  
446 PAGE. After staining the gel with Instant Blue (Expedeon, Cat. #ISB1L), selected bands were  
447 excised and the proteins in them were sequenced by MS-MS at the UCLA proteomics core  
448 facility. To verify that gC1qR bound to *C. glabrata* cells that had been coated with fresh serum,  
449 the pull-down assay was repeated and Western blotting was performed with the anti-gC1qR  
450 antibody (clone 74.5.2).

451 To detect serum proteins that bind to *C. glabrata*,  $1 \times 10^8$  *C. glabrata* cells were incubated  
452 with 20% fresh or heat-inactivated or serum in RPMI 1640 medium for 1 hr at 37°C. Unbound  
453 serum proteins were removed by rinsing the cells twice with PBS, after which bound serum  
454 proteins were eluted with 2M HCl, pH 2.0 and immediately neutralized with Tris buffer, pH 8.0.  
455 The proteins were separated by SDS-PAGE and Western blotting using an anti-kininogen heavy  
456 chain antibody (Santa Cruz Biotechnology, clone 2B5, Cat. # sc-23914), anti-light chain  
457 antibody (Santa Cruz Biotechnology, clone 14J09, Cat. # sc-80524), and anti-vitronectin  
458 antibody (clone 8E6(LJ8)) was performed to detect kininogen and vitronectin that had been  
459 eluted from *C. glabrata*.

460  
461 **siRNA.** Knockdown of endothelial cell surface proteins was accomplished using siRNA. The  
462 endothelial cells were transfected with gC1qR siRNA (Santa Cruz Biotechnology, Cat. #  
463 sc-42880), integrin  $\alpha 5$  siRNA (Santa Cruz Biotechnology, Cat. # sc-29372), integrin  $\alpha v$  siRNA  
464 (Santa Cruz Biotechnology, Cat. # sc-29373), or scrambled control siRNA (Qiagen, Cat. #  
465 1027281) using Lipofectamine 2000 (Thermo Fisher Scientific) following the manufacturer's  
466 instructions. After 48 hr, the transfected endothelial cells were infected with serum coated *C.*

467 *glabrata* and the number of endocytosed organisms was determined. Knockdown of each  
468 protein was verified by immunoblotting with antibodies against gC1qR (clone 74.5.2), integrin  $\alpha 5$   
469 (Millipore-Sigma, Cat. # AB1928), integrin  $\alpha v$  (Santa Cruz Biotechnology, clone H-2, Cat # sc-  
470 376156), integrin  $\beta 3$  (Santa Cruz Biotechnology, clone B-7, Cat. # sc-46655), integrin  $\beta 5$  (Santa  
471 Cruz Biotechnology, clone F-5, Cat. # sc-398214), or actin (Millipore-Sigma, clone C4, Cat. #  
472 A5441-100UL)

473  
474 **Flow cytometry.** The binding of kininogen and vitronectin to *C. glabrata* was analyzed by a  
475 modification of a previously described method (51). *C. glabrata* cells were incubated with  
476 kininogen that had been labeled with Alexa Fluor 568 (Thermo Fisher Scientific, Cat. #A20184)  
477 and/or unlabeled vitronectin, both at a final concentration of 30  $\mu\text{g/ml}$ , for 1 hr at 37°C. Control  
478 cells were incubated in a similar concentration of BSA. The unbound proteins were removed by  
479 washing the cells twice with PBS. Next, the cells were incubated with the anti-vitronectin  
480 antibody followed by the Alexa Fluor 488-labeled goat anti-mouse secondary antibody. The  
481 fluorescence of the cells was then quantified using a Becton Dickinson FACScalibur flow  
482 cytometer, analyzing 10,000 cells per sample using the FlowJo software.

483 The potential binding the anti- $\alpha v\beta 3$  and anti- $\alpha v\beta 5$  antibodies to *C. glabrata* was  
484 determined by incubating *C. glabrata* cells with each antibody at a final concentration of 10  
485  $\mu\text{g/ml}$ , followed by the Alexa Fluor 488-labeled goat anti-mouse secondary antibody The  
486 fluorescence of the cells was then quantified by flow cytometer, analyzing 10,000 cells per  
487 sample.

488  
489 **Endothelial cell damage assay.** The capacity of wild-type (CAI4-URA) and *als3 $\Delta$ / $\Delta$  ssa1 $\Delta$ / $\Delta$*   
490 *C. albicans* strains to damage human umbilical vein endothelial cells was determined using our  
491 previously described  $^{51}\text{Cr}$  release assay (6). Endothelial cells were grown in a 96-well tissue

492 culture plate containing detachable wells and loaded with  $^{51}\text{Cr}$ . The *C. albicans* were coated  
493 with either BSA or kininogen and vitronectin and rinsed, after which  $4 \times 10^4$  fungal cells were  
494 added to individual wells of endothelial cells. After incubation for 3 h, the medium above the  
495 cells was aspirated and the wells were detached from each other. The amount of  $^{51}\text{Cr}$  released  
496 into the medium and remaining in the endothelial cells was determined using a gamma counter.

497 When the *C. glabrata*, *C. tropicalis*, *C. parapsilosis*, *C. krusei*, and *C. auris* strains were  
498 tested in the damage assay, they were processed similarly to the *C. albicans* cells except that  
499 the inoculum was increased to  $2 \times 10^5$  cells per well and the incubation period was increased to  
500 6 h.

501  
502 **Lentivirus packaging and host cell transduction.** The transfer vectors (pLenti-EF1A-EGFP-  
503 Blast, pLenti-EF1A-hITGAV-NEO, pLenti-EF1A-hITGB5-NEO or pLenti-EF1A-hC1QBP-Blast)  
504 were constructed by cloning eGFP, hC1QBP [NM\_001212.4], hITGAV [NM\_002210], or hITGB5  
505 [NM\_002213] into pLenti-Cas9-Blast (Addgene; # 52962) or pLenti-Cas9-NEO at the BamHI  
506 and XbaI sites. The virus was produced by transfecting HEK293T cells with plasmid psPAX2  
507 (Addgene; # 12260), plasmid pCMV-VSVG (Addgene; # 8454), and transfer vector at 1:1:1  
508 molar ratio using the X-tremeGENE 9 DNA transfection reagent (Sigma-Aldrich; # 6365787001)  
509 according to the manufacturer's instructions. The supernatant containing the virus was collected  
510 at 60 h post-transfection, passed through a 0.45 $\mu\text{m}$  PVDF filter and stored at 4°C (short-term) or  
511 -80°C (long-term).

512 For transduction, mouse primary liver endothelial cells were seeded into a 6-well plate in  
513 mouse endothelial cell medium (Cell Biologics, Inc. # M1168). The cells were transduced with  
514 lentivirus in the presence of 8  $\mu\text{g}/\text{ml}$  polybrene (Santa Cruz Biotechnology; #SC134220),  
515 centrifuged at 1000g for 30 min, and then incubated at 37°C in 5%  $\text{CO}_2$  overnight. The next  
516 morning, the cells were transferred to 10 cm diameter tissue culture dishes. For the cells  
517 transduced with hC1QBP, 10  $\mu\text{g}/\text{ml}$  of blasticidin (Gibco; # A1113903) was added to the

518 medium 2 d post transduction to select for transduced cells and selection was maintained for 7  
519 d. Expression of eGFP was determined by fluorescent microscopy and expression of gC1qR,  
520 integrin  $\alpha$ v, and integrin  $\beta$ 5 were verified via immunoblotting of whole cell lysates with an anti-  
521 gC1qR antibody (clone 60.11), anti- integrin  $\alpha$ v antibody (MilliporeSigma; #AB1930), and anti-  
522 integrin  $\beta$ 5 antibody (My Biosource, Inc; # MBS617750). Total loading was determined by  
523 immunoblotting with an anti-GAPDH antibody (Cell Signaling; # 5174).

524

525 **Statistical analysis.** All data were analyzed using Prism (GraphPad). Differences among  
526 experimental groups were analyzed by one-way analysis of variance followed by pair-wise  
527 analysis with Dunnett's multiple comparison test. When a single pair of data was analyzed, the  
528 2-way student's t-test assuming unequal variance was used. *P* values  $\leq 0.05$  were considered  
529 to be significant.

530

#### 531 **Data availability**

532 The raw data that support the findings of this study are available from the corresponding author  
533 upon request.

534

535



## 536 Acknowledgments

537 This work was supported in part by NIH grant R01AI124566 to S.G.F., R00DE026856 to M.S.,  
538 and R01AI141202 to A.S.I. The collection of umbilical cords for this project was supported in  
539 part by the National Center for Advancing Translational Sciences through UCLA CTSI Grant  
540 UL1TR001881. We thank Adam Diab for assistance with tissue culture and Nathan Wiederhold  
541 for providing the clinical isolates.

542

543 .

## References

1. M. A. Pfaller *et al.*, Bloodstream infections due to *Candida* species: SENTRY antimicrobial surveillance program in North America and Latin America, 1997-1998. *Antimicrob. Agents Chemother.* **44**, 747-751. (2000).
2. M. Pfaller *et al.*, Epidemiology and outcomes of candidemia in 3648 patients: data from the Prospective Antifungal Therapy (PATH Alliance(R)) registry, 2004-2008. *Diagn Microbiol Infect Dis* **74**, 323-331 (2012).
3. A. A. Cleveland *et al.*, Changes in incidence and antifungal drug resistance in candidemia: results from population-based laboratory surveillance in Atlanta and Baltimore, 2008-2011. *Clin. Infect. Dis.* **55**, 1352-1361 (2012).
4. S. E. Grubb *et al.*, *Candida albicans*-endothelial cell interactions: a key step in the pathogenesis of systemic candidiasis. *Infect. Immun.* **76**, 4370-4377 (2008).
5. J. N. Sun *et al.*, Host cell invasion and virulence mediated by *Candida albicans* Ssa1. *PLoS Pathog.* **6**, e1001181 (2010).
6. Q. T. Phan *et al.*, Als3 is a *Candida albicans* invasin that binds to cadherins and induces endocytosis by host cells. *PLoS Biol* **5**, e64 (2007).
7. W. Zhu *et al.*, EGFR and HER2 receptor kinase signaling mediate epithelial cell invasion by *Candida albicans* during oropharyngeal infection. *Proc. Natl. Acad. Sci. USA* **109**, 14194-14199 (2012).
8. Q. T. Phan, R. A. Fratti, N. V. Prasadarao, J. E. Edwards, Jr., S. G. Filler, N-cadherin mediates endocytosis of *Candida albicans* by endothelial cells. *J. Biol. Chem.* **280**, 10455-10461 (2005).
9. Y. Liu, R. Mittal, N. V. Solis, N. V. Prasadarao, S. G. Filler, Mechanisms of *Candida albicans* trafficking to the brain. *PLoS Pathog.* **7**, e1002305 (2011).
10. S. G. Filler, B. O. Ibe, P. M. Lockett, J. U. Raj, J. E. Edwards, Jr., *Candida albicans* stimulates endothelial cell eicosanoid production. *J. Infect. Dis.* **164**, 928-935 (1991).
11. Q. T. Phan, P. H. Belanger, S. G. Filler, Role of hyphal formation in interactions of *Candida albicans* with endothelial cells. *Infect. Immun.* **68**, 3485-3490 (2000).
12. S. P. Saville, A. L. Lazzell, C. Monteagudo, J. L. Lopez-Ribot, Engineered control of cell morphology in vivo reveals distinct roles for yeast and filamentous forms of *Candida albicans* during infection. *Eukaryot. Cell* **2**, 1053-1060 (2003).
13. C. G. Chen *et al.*, Non-lethal *Candida albicans* *cph1/cph1 efg1/efg1* transcription factor mutant establishing restricted zone of infection in a mouse model of systemic infection. *Int J Immunopathol Pharmacol* **19**, 561-565 (2006).

14. H. J. Lo *et al.*, Nonfilamentous *C. albicans* mutants are avirulent. *Cell* **90**, 939-949 (1997).
15. C. Moran, C. A. Grussemer, J. R. Spalding, D. K. Benjamin, Jr., S. D. Reed, Comparison of costs, length of stay, and mortality associated with *Candida glabrata* and *Candida albicans* bloodstream infections. *Am. J. Infect. Control* **38**, 78-80 (2010).
16. T. Shintaku *et al.*, Human endothelial cells internalize *Candida parapsilosis* via N-WASP-mediated endocytosis. *Infect. Immun.* **81**, 2777-2787 (2013).
17. A. L. Cheung, M. Krishnan, E. A. Jaffe, V. A. Fischetti, Fibrinogen acts as a bridging molecule in the adherence of *Staphylococcus aureus* to cultured human endothelial cells. *J. Clin. Investig.* **87**, 2236-2245 (1991).
18. B. Singh, Y. C. Su, K. Riesbeck, Vitronectin in bacterial pathogenesis: a host protein used in complement escape and cellular invasion. *Mol. Microbiol.* **78**, 545-560 (2010).
19. X. L. Xu *et al.*, Bacterial peptidoglycan triggers *Candida albicans* hyphal growth by directly activating the adenylyl cyclase Cyr1p. *Cell Host Microbe* **4**, 28-39 (2008).
20. E. I. Peerschke, B. Ghebrehwet, The contribution of gC1qR/p33 in infection and inflammation. *Immunobiology* **212**, 333-342 (2007).
21. J. Jiang, Y. Zhang, A. R. Krainer, R. M. Xu, Crystal structure of human p32, a doughnut-shaped acidic mitochondrial matrix protein. *Proc. Natl. Acad. Sci. USA* **96**, 3572-3577 (1999).
22. F. Mahdi, Z. Shariat-Madar, R. F. Todd, 3rd, C. D. Figueroa, A. H. Schmaier, Expression and colocalization of cytokeratin 1 and urokinase plasminogen activator receptor on endothelial cells. *Blood* **97**, 2342-2350 (2001).
23. B. Ghebrehwet, J. Jesty, E. I. Peerschke, gC1q-R/p33: structure-function predictions from the crystal structure. *Immunobiology* **205**, 421-432 (2002).
24. B. Ghebrehwet *et al.*, Identification of functional domains on gC1Q-R, a cell surface protein that binds to the globular "heads" of C1Q, using monoclonal antibodies and synthetic peptides. *Hybridoma* **15**, 333-342 (1996).
25. S. A. Klotz, M. L. Pendrak, R. C. Hein, Antibodies to alpha5beta1 and alpha(v)beta3 integrins react with *Candida albicans* alcohol dehydrogenase. *Microbiology* **147**, 3159-3164 (2001).
26. E. Spreghini, A. Gismondi, M. Piccoli, G. Santoni, Evidence for alphavbeta3 and alphavbeta5 integrin-like vitronectin (VN) receptors in *Candida albicans* and their involvement in yeast cell adhesion to VN. *J. Infect. Dis.* **180**, 156-166 (1999).
27. G. Lalmanach, C. Naudin, F. Lecaille, H. Fritz, Kininogens: More than cysteine protease inhibitors and kinin precursors. *Biochimie* **92**, 1568-1579 (2010).
28. M. Swidergall *et al.*, Activation of EphA2-EGFR signaling in oral epithelial cells by *Candida albicans* virulence factors. *PLoS Pathog.* **17**, e1009221 (2021).
29. D. L. Moyes *et al.*, Candidalysin is a fungal peptide toxin critical for mucosal infection. *Nature* **532**, 64-68 (2016).
30. S. G. Filler, J. N. Swerdloff, C. Hobbs, P. M. Luckett, Penetration and damage of endothelial cells by *Candida albicans*. *Infect. Immun.* **63**, 976-983 (1995).
31. A. A. Sanchez *et al.*, Relationship between *Candida albicans* virulence during experimental hematogenously disseminated Infection and endothelial cell damage In vitro. *Infect. Immun.* **72**, 598-601 (2004).
32. M. Paulsson, K. Riesbeck, How bacteria hack the matrix and dodge the bullets of immunity. *Eur Respir Rev* **27** (2018).
33. M. Dehio, O. G. Gomez-Duarte, C. Dehio, T. F. Meyer, Vitronectin-dependent invasion of epithelial cells by *Neisseria gonorrhoeae* involves alpha(v) integrin receptors. *FEBS Lett* **424**, 84-88 (1998).
34. E. Buommino *et al.*, AlphaVBeta5 integrins mediates *Pseudomonas fluorescens* interaction with A549 cells. *Front Biosci (Landmark Ed)* **19**, 408-415 (2014).

35. C. M. Lopez, R. Wallich, K. Riesbeck, C. Skerka, P. F. Zipfel, *Candida albicans* uses the surface protein Gpm1 to attach to human endothelial cells and to keratinocytes via the adhesive protein vitronectin. *PLoS ONE* **9** (2014).
36. A. Kozik *et al.*, Fibronectin-, vitronectin- and laminin-binding proteins at the cell walls of *Candida parapsilosis* and *Candida tropicalis* pathogenic yeasts. *BMC Microbiol* **15**, 197 (2015).
37. I. M. Frick *et al.*, The contact system--a novel branch of innate immunity generating antibacterial peptides. *Embo J.* **25**, 5569-5578 (2006).
38. E. C. Murphy, M. Morgelin, J. C. Cooney, I. M. Frick, Interaction of *Bacteroides fragilis* and *Bacteroides thetaiotaomicron* with the kallikrein-kinin system. *Microbiology* **157**, 2094-2105 (2011).
39. M. Rapala-Kozik *et al.*, Kininogen adsorption to the cell surface of *Candida* spp. *Int Immunopharmacol* **8**, 237-241 (2008).
40. J. Karkowska-Kuleta *et al.*, Molecular determinants of the interaction between human high molecular weight kininogen and *Candida albicans* cell wall: Identification of kininogen-binding proteins on fungal cell wall and mapping the cell wall-binding regions on kininogen molecule. *Peptides* **32**, 2488-2496 (2011).
41. J. Karkowska-Kuleta, A. Kozik, M. Rapala-Kozik, Binding and activation of the human plasma kinin-forming system on the cell walls of *Candida albicans* and *Candida tropicalis*. *Biol Chem* **391**, 97-103 (2010).
42. T. Chavakis *et al.*, High molecular weight kininogen regulates platelet-leukocyte interactions by bridging Mac-1 and glycoprotein Ib. *J. Biol. Chem.* **278**, 45375-45381 (2003).
43. K. Joseph, B. Ghebrehiwet, E. I. Peerschke, K. B. Reid, A. P. Kaplan, Identification of the zinc-dependent endothelial cell binding protein for high molecular weight kininogen and factor XII: identity with the receptor that binds to the globular "heads" of C1q (gC1q-R). *Proc. Natl. Acad. Sci. USA* **93**, 8552-8557 (1996).
44. L. Braun, B. Ghebrehiwet, P. Cossart, gC1q-R/p32, a C1q-binding protein, is a receptor for the InlB invasion protein of *Listeria monocytogenes*. *Embo J.* **19**, 1458-1466 (2000).
45. A. Cortegiani *et al.*, Epidemiology, clinical characteristics, resistance, and treatment of infections by *Candida auris*. *J Intensive Care* **6**, 69 (2018).
46. M. Arendrup, T. Horn, N. Frimodt-Moller, In vivo pathogenicity of eight medically relevant *Candida* species in an animal model. *Infection* **30**, 286-291 (2002).
47. S. Singh *et al.*, The NDV-3A vaccine protects mice from multidrug resistant *Candida auris* infection. *PLoS Pathog.* **15**, e1007460 (2019).
48. E. A. Jaffe, R. L. Nachman, C. G. Becker, C. R. Minick, Culture of human endothelial cells derived from umbilical veins. Identification by morphologic and immunologic criteria. *J. Clin. Investig.* **52**, 2745-2756 (1973).
49. H. Park *et al.*, Role of the fungal Ras-protein kinase A pathway in governing epithelial cell interactions during oropharyngeal candidiasis. *Cell. Microbiol.* **7**, 499-510 (2005).
50. Y. Fu *et al.*, Investigation of the function of *Candida albicans* Als3 by heterologous expression in *Candida glabrata*. *Infect. Immun.* **81**, 2528-2535 (2013).
51. S. Bergmann *et al.*, Integrin-linked kinase is required for vitronectin-mediated internalization of *Streptococcus pneumoniae* by host cells. *J. Cell Sci.* **122**, 256-267 (2009).

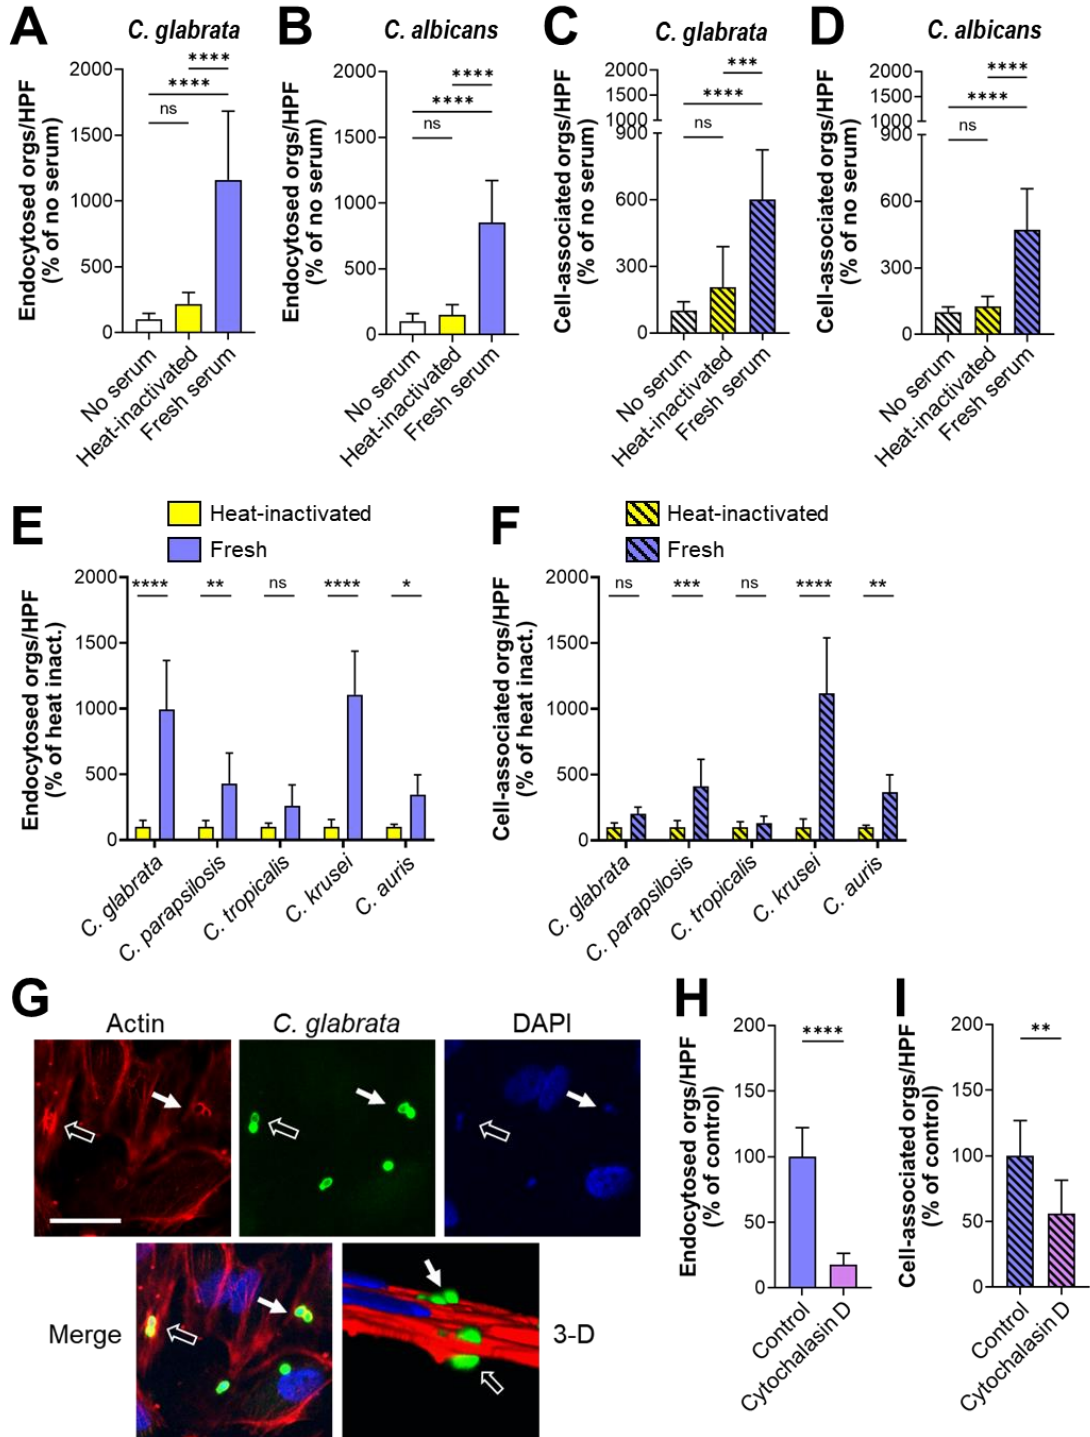

**Fig. 1.** Serum coating increases the endocytosis of *Candida* spp. by endothelial cells. (A-D), Effects of fresh and heat-inactivated human serum on the number of organisms that were endocytosed by and cell-associated (a measure of adherence) with human umbilical vein endothelial cells. (A) Endocytosis of live *C. glabrata*, (B) endocytosis of killed wild-type *C. albicans* yeast, (C) cell-association of live *C. glabrata*, and (D) cell-association of killed wild-type *C. albicans* yeast. (E-F) Endocytosis (E) and cell-association (F) of live *C. glabrata*, *C. parapsilosis*, *C. tropicalis*, *C. krusei*, and *C. auris*. (G) Confocal micrographs showing the

accumulation of phalloidin-stained endothelial cell actin around endocytosed *C. glabrata* cells. Results are representative of 3 independent experiments. Arrows indicate the *C. glabrata* cells and the actin that has accumulated around them. Scale bar, 10  $\mu\text{m}$ . (H and I) Effects of cytochalasin D on the endocytosis (H) and cell-association (I) of live *C. glabrata* coated with fresh human serum. Results are the mean  $\pm$  SD of 3 experiments each performed in triplicate. Orgs/HPF, organisms per high-power field; ns, not significant; \* $P < 0.05$ , \*\* $P < 0.01$ , \*\*\* $P < 0.001$ , \*\*\*\* $P < 0.0001$  by ANOVA with the Dunnett's test for multiple comparisons.

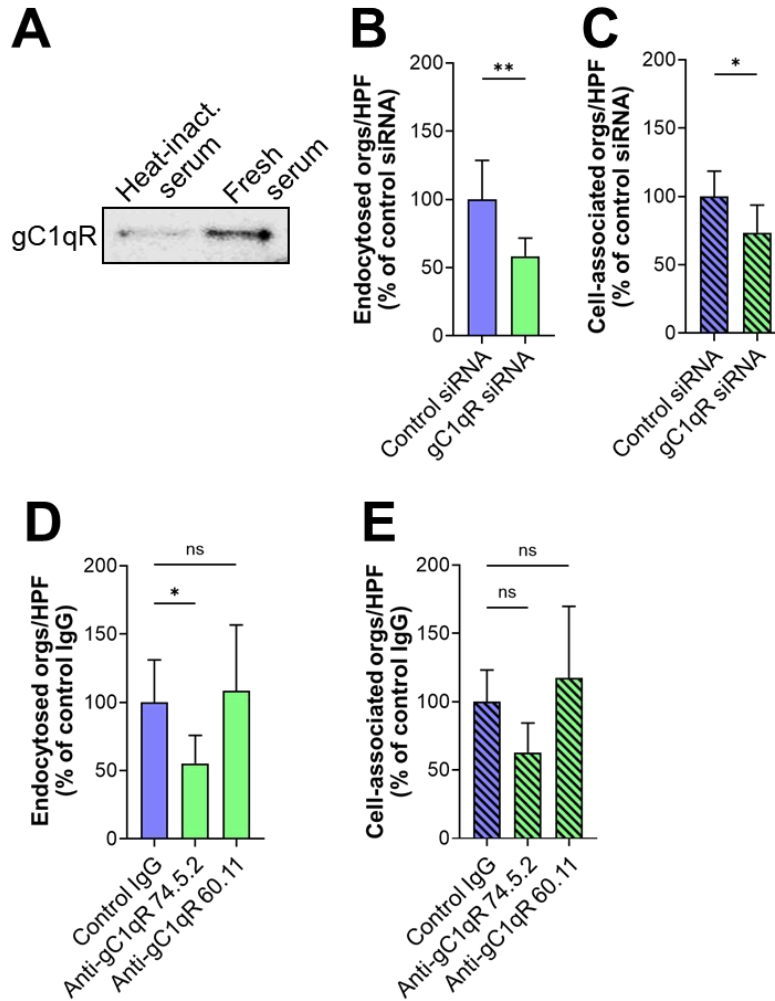

**Fig. 2** The globular C1q receptor (gC1qR) is an endothelial cell receptor for serum-coated *C. glabrata*. (A) Western blot showing that endothelial cell gC1qR binds to *C. glabrata* coated with fresh serum. Results are representative of 3 independent experiments. (B-E) Effects of inhibiting gC1qR function with siRNA knockdown (B and C) and specific monoclonal antibodies (D and E) on the endocytosis (B and D) and cell-association (C and E) of *C. glabrata* coated with fresh serum. Results shown in (B-E) are the mean  $\pm$  SD of 3 experiments each performed in triplicate. Heat inact., heat inactivated serum; orgs/HPF, organisms per high-power field; ns, not significant, \* $P < 0.05$ , \*\* $P < 0.01$ .



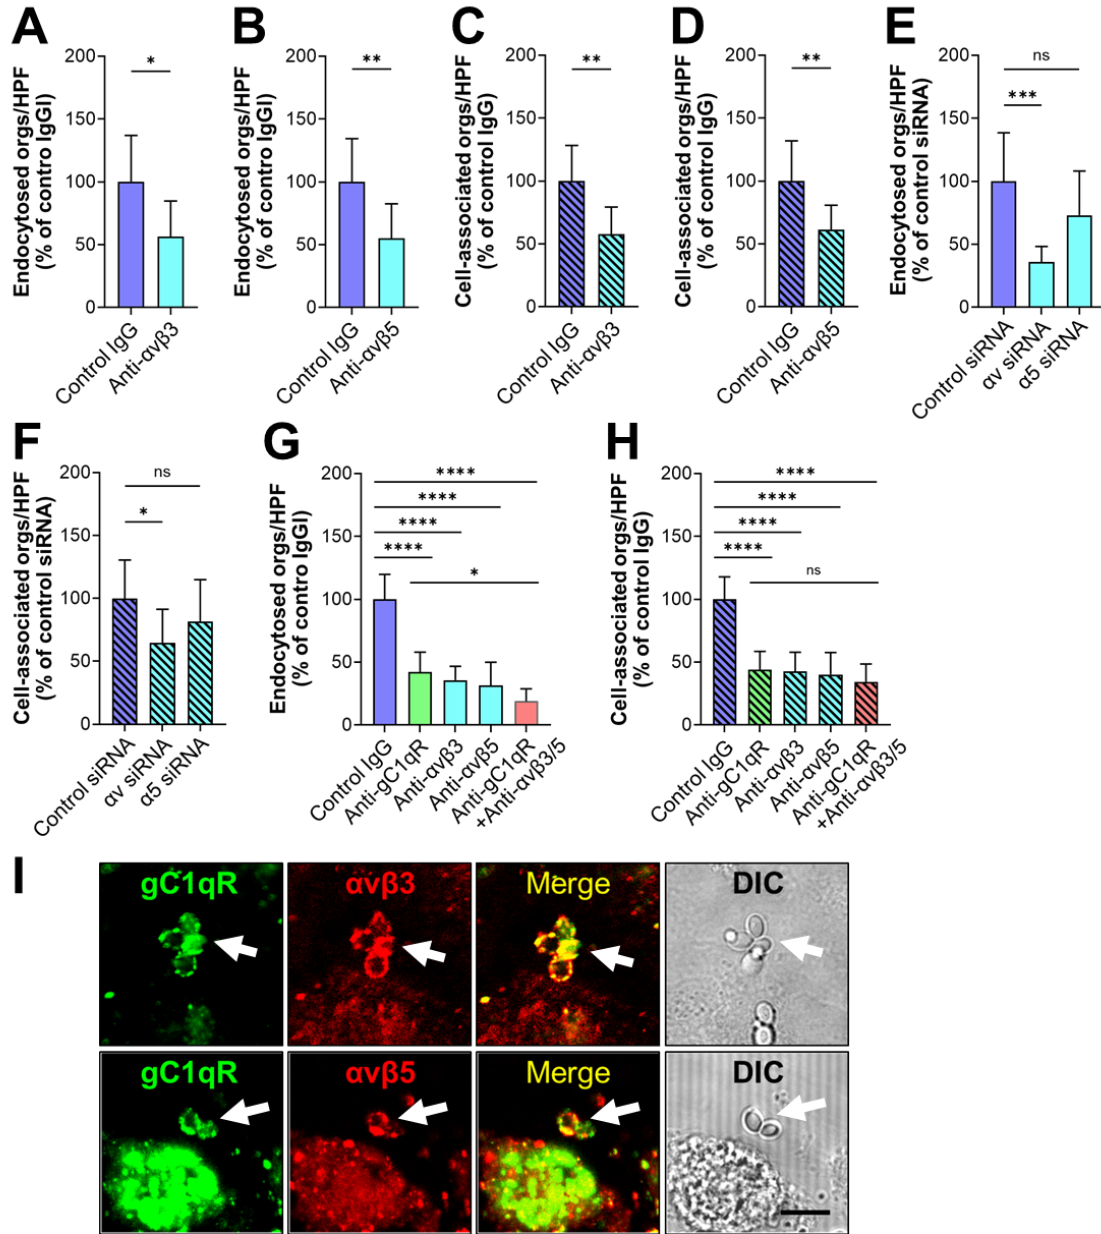

**Fig. 3.** Integrins  $\alpha v\beta 3$  and  $\alpha v\beta 5$  are endothelial cell receptors for serum-coated *C. glabrata*. (A-F) Effects of inhibiting  $\alpha v$  integrin function with specific monoclonal antibodies (A-D) and siRNA knockdown (E-F) on the endocytosis (A, B, E) and cell-association (C, D, F) of serum-coated *C. glabrata*. (G and H) Inhibition of gC1qR (with monoclonal antibody 74.5.2) and  $\alpha v$  integrins has an additive effect on decreasing the endocytosis (G) but not cell-association of serum-coated *C. glabrata* (H). (I) Confocal micrographs showing the accumulation of gC1qR and integrins  $\alpha v\beta 3$  and  $\alpha v\beta 5$  around serum-coated *C. glabrata* cells. Representative results of 3 independent experiments. Arrows indicate the *C. glabrata* cells and the endothelial cell receptors that have accumulated around them. Scale bar, 7  $\mu$ m. Results shown in (A-H) are the mean  $\pm$  SD of 3 experiments each performed in triplicate. Orgs/HPF, organisms per high power field; ns, not significant; \* $P < 0.05$ , \*\* $P < 0.01$ , \*\*\* $P < 0.001$ , \*\*\*\* $P < 0.0001$ .

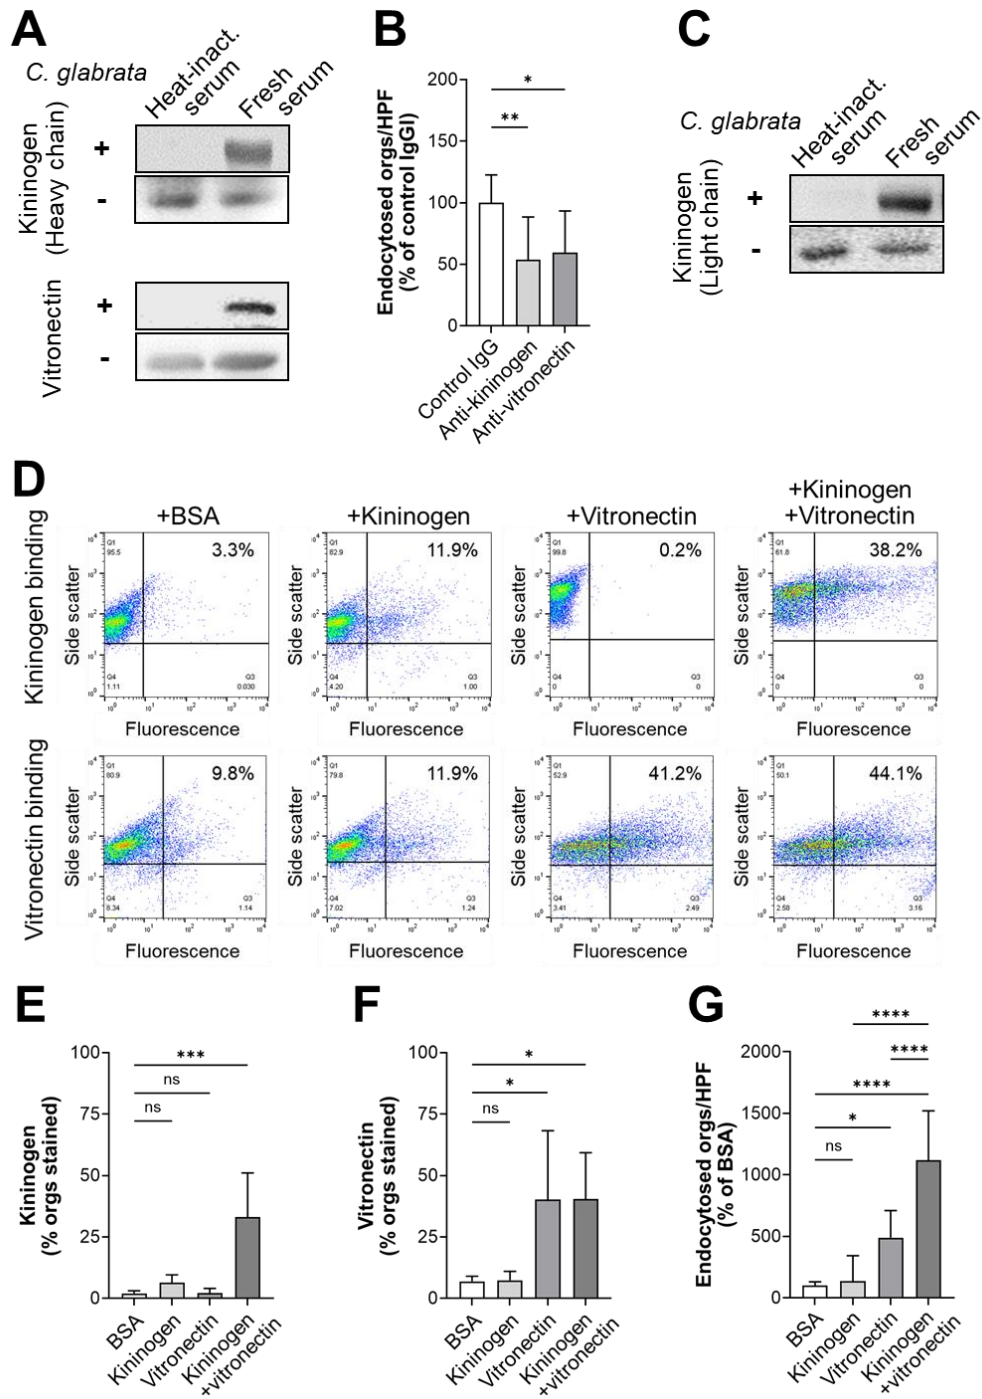

**Fig. 4.** High molecular weight kininogen and vitronectin function as bridging molecules. (A) Western blots showing that the heavy chain of high molecular weight kininogen and vitronectin bind to *C. glabrata* cells that have been incubated in fresh human serum. In each pair of blots, the upper panel shows the proteins that were eluted from *C. glabrata* and lower panel shows the proteins present in serum in the absence of *C. glabrata*. (B) Effects of anti-kininogen and anti-vitronectin antibodies on the endocytosis of serum-coated *C. glabrata* by endothelial cells. (C) Western blot showing that the kininogen light chain binds to *C. glabrata* cells that have been



incubated in fresh human serum. (D) Flow cytometric detection of the binding of kininogen (top row) and vitronectin (bottom row) to *C. glabrata* cells that had been incubated for 1 h with BSA without kininogen or vitronectin, kininogen alone, vitronectin alone, or kininogen and vitronectin. Numbers in the upper right hand corner indicate the percentage of positive cells. Results are representative of 5 (kininogen) or 4 (vitronectin) separate experiments, each of which analyzed 10,000 cells. (E-F) Summary of combined flow cytometry results showing the binding of kininogen (E) and vitronectin (F) to *C. glabrata* cells. (G) Endocytosis of *C. glabrata* cells that had been coated with the indicated proteins. Data in (B) and (G) are the mean  $\pm$  SD of 3 experiments each performed in triplicate. Orgs/HPF, organisms per high power field; ns, not significant; \* $P < 0.05$ , \*\* $P < 0.01$ , \*\*\* $P < 0.001$ , \*\*\*\* $P < 0.0001$ .

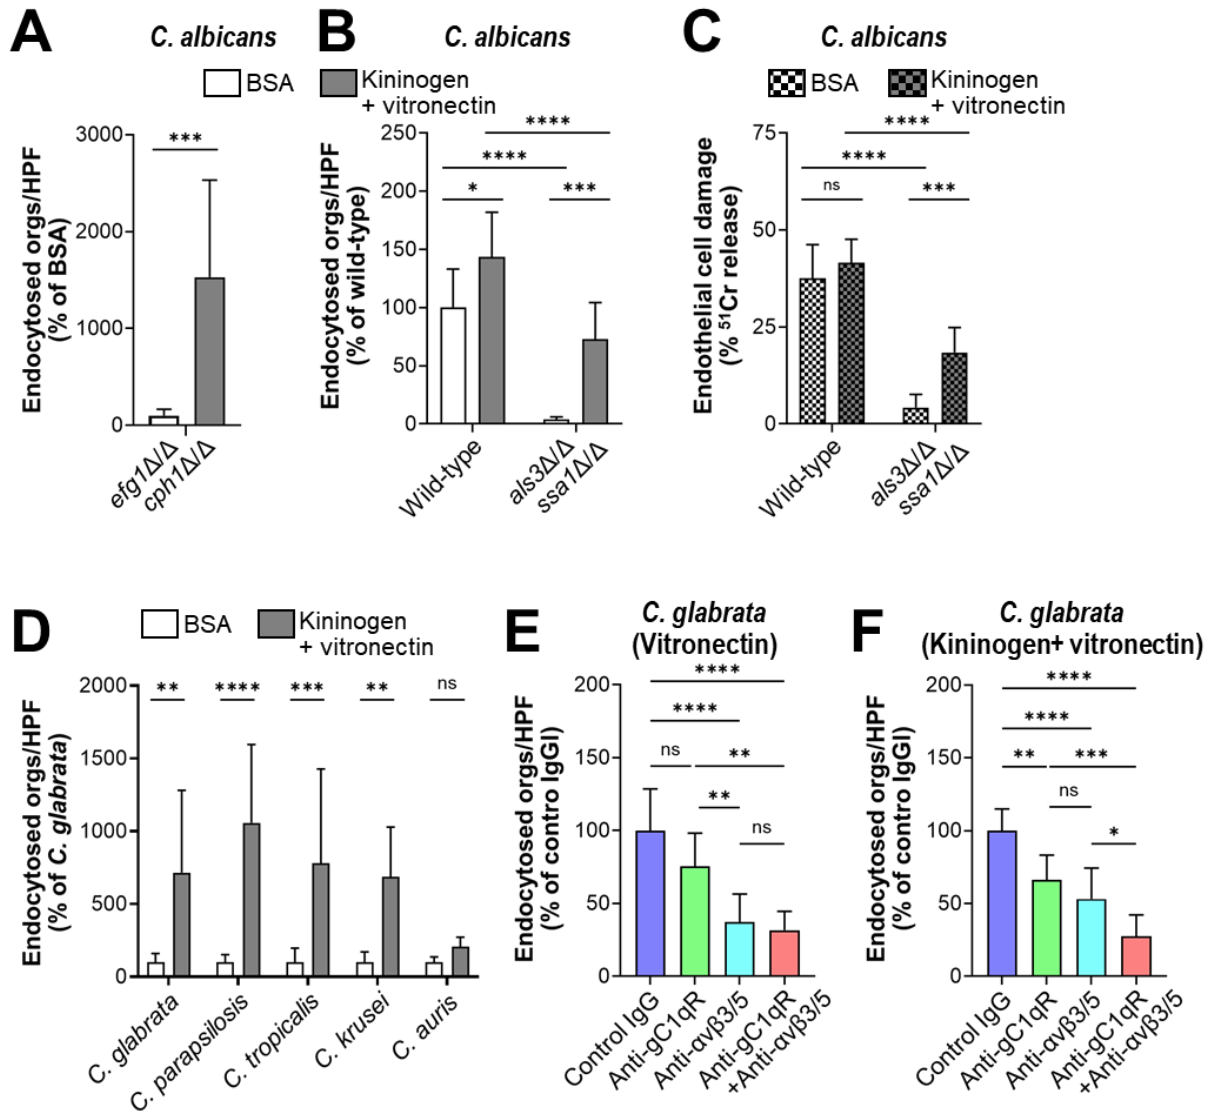

**Fig. 5.** Kininogen and vitronectin interact with gC1qR and  $\alpha$ v integrins to induce endocytosis. (A and B) Effects of BSA or kininogen and vitronectin on the endocytosis the indicated strains of *C. albicans*. (C) Effects of BSA or kininogen on endothelial cell damage caused by the indicated strains of *C. albicans*. (D) Kininogen and vitronectin increase endothelial cell endocytosis of the indicated *Candida* spp. (E and F) Inhibition of endocytosis of *C. glabrata* coated with either vitronectin alone (E) or vitronectin and kininogen (F) by antibodies against gC1qR (clone 74.5.2) and/or integrins  $\alpha$ v $\beta$ 3 and  $\alpha$ v $\beta$ 5. Data are the mean  $\pm$  SD of 3 experiments each performed in triplicate. Orgs/HPF, organisms per high power field; ns, not significant; \* $P < 0.05$ , \*\* $P < 0.01$ , \*\*\* $P < 0.001$ , \*\*\*\* $P < 0.0001$ .

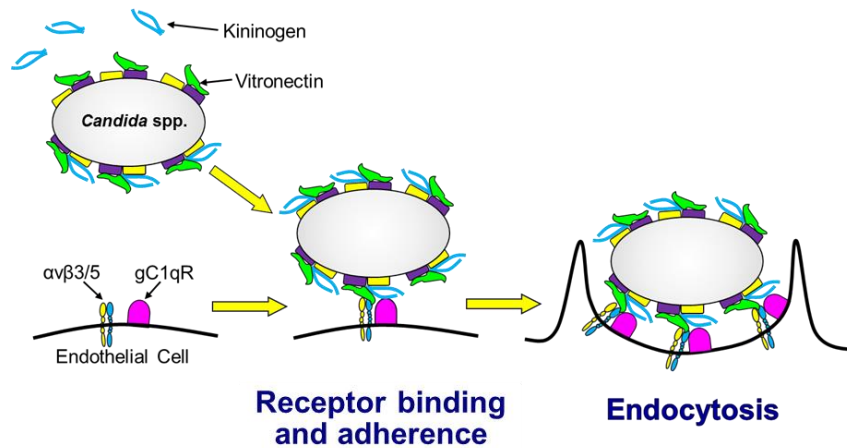

**Fig. 6. Model of how kininogen and vitronectin function as bridging molecules that bind to *Candida* spp. and induce endocytosis by human endothelial cells.** Vitronectin binds to the surface of the organism, which enhances the binding of kininogen. When the organism comes in contact with the endothelial cell, vitronectin interacts mainly with the integrins  $\alpha v \beta 3$  and  $\alpha v \beta 5$  and whereas the vitronectin-kininogen complex interacts with both the  $\alpha v$  integrins and gC1qR on the endothelial cells surface. These interactions mediate the adherence of the fungus to the endothelial cell and induce the endothelial cell to endocytose the organism.

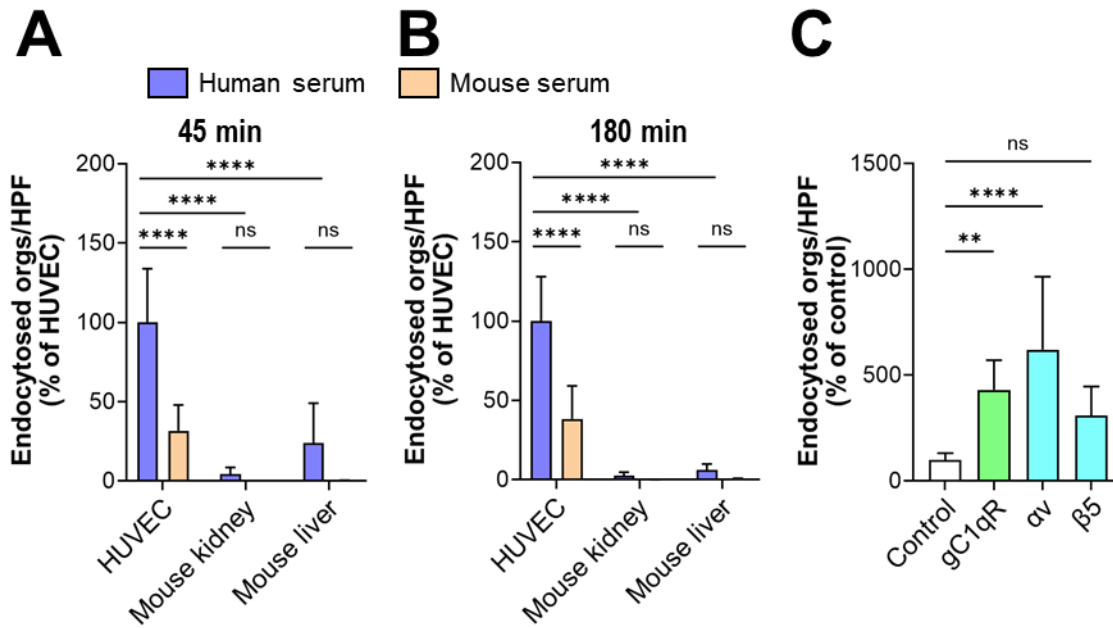

**Fig. 7.** Mouse endothelial cells poorly support bridging molecule-mediated endocytosis. (A and B) Endocytosis of *C. glabrata* coated with either human or mouse serum by the indicated endothelial cells after 45 min (A) and 180 min (B). (C) Endocytosis of *C. glabrata* coated with fresh human serum by mouse liver endothelial cells expressing human gC1qR, integrin  $\alpha$ v, or integrin  $\beta$ 5. Data are the mean  $\pm$  SD of 3 experiments each performed in triplicate. HUVEC, human umbilical vein endothelial cell; orgs/HPF, organisms per high power field; ns, not significant; \*\* $P < 0.01$ , \*\*\*\* $P < 0.0001$ . \*\*\* $P < 0.001$ , \*\*\*\* $P < 0.0001$ .
